# Supplementary material for: Programmable Low-Pressure Chromatographic Sub-90 s Assay of Parabens in Cosmetics with Post-Column Chemiluminescence Detection
Source: MDPI journal article supplement (doi:10.3390/separations10060350), 2023-06-11
Supplement: s1 [file s1]

Archive with 1 entries (1 files):
- separations-2431647-supplementary.pdf
